# Supplementary material
Source: PubMed Central journal article supplement (PMC10529063)
Supplement: NIHMS1921209-supplement-Figure_S2.pdf [file NIHMS1921209-supplement-Figure_S2.pdf]

RT\_Unstained\_001\_002.fcs

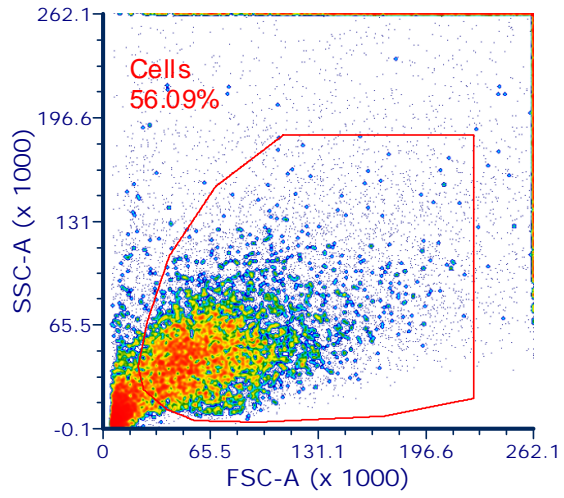

RT\_Unstained\_001\_002.fcs

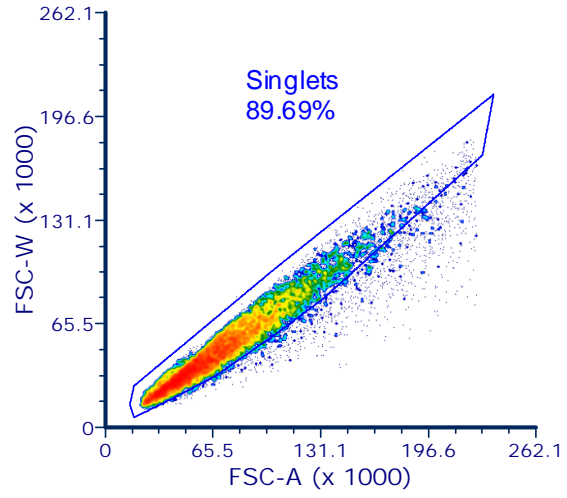

RT\_Unstained\_001\_002.fcs

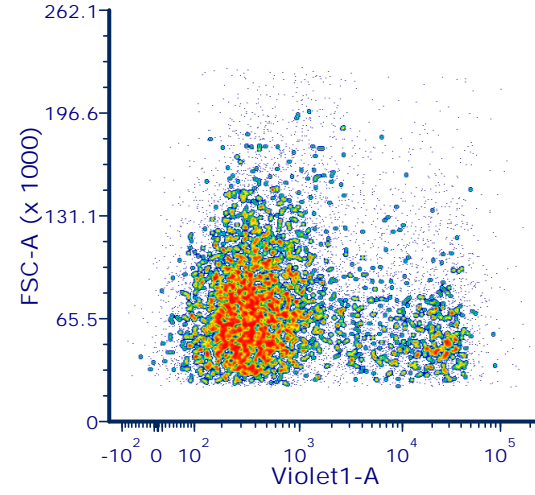

RT\_Unstained\_001\_002.fcs

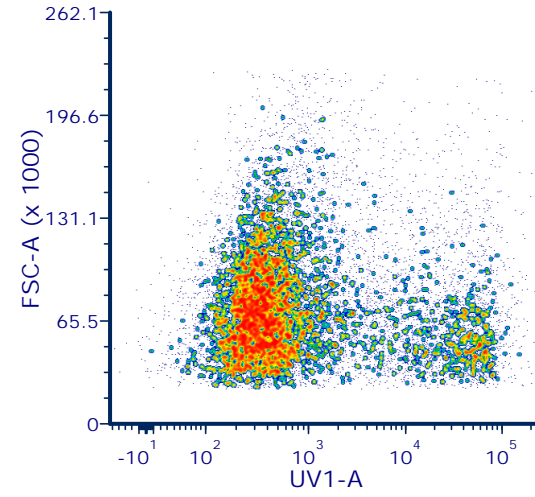

**RT**

**Unstained  
(No Abs)**

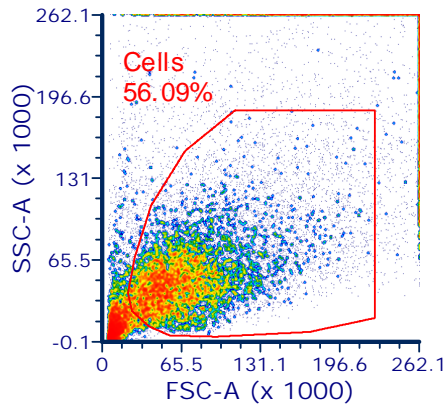

**CD45\_negative**

**Epcam\_negative**

**Epcam\_positive**

**CD45\_positive**

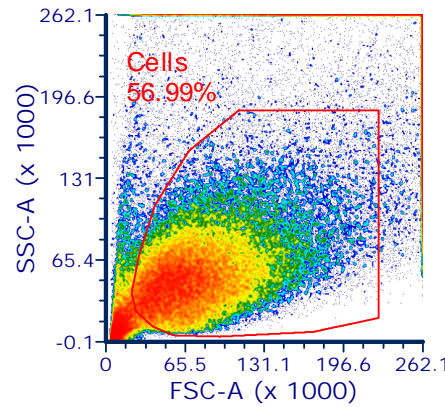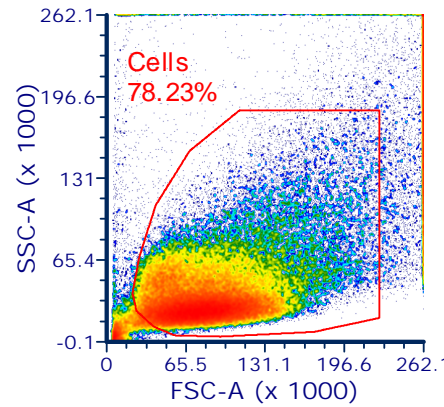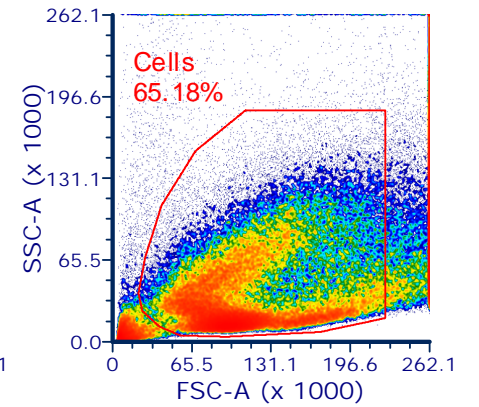

**4C**

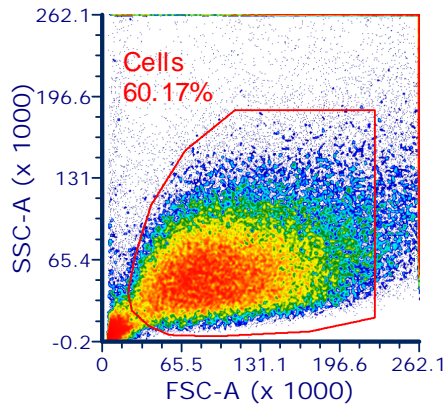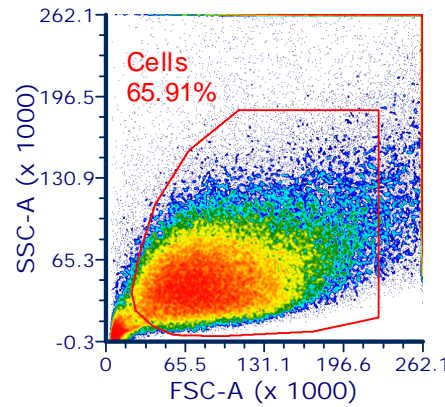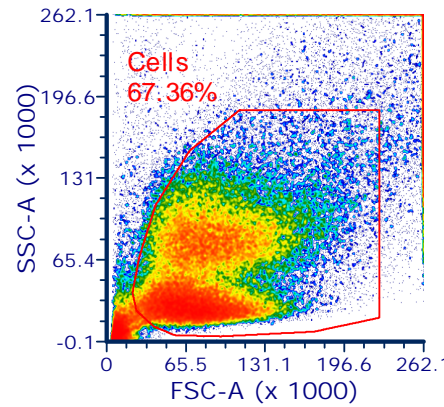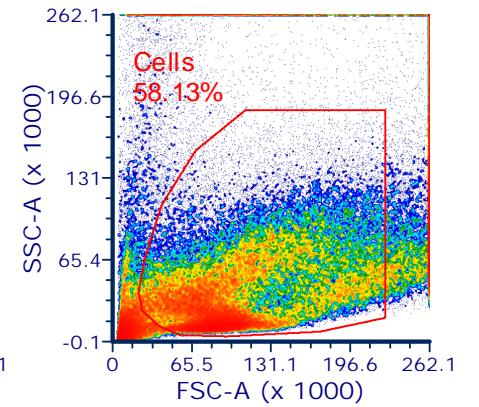

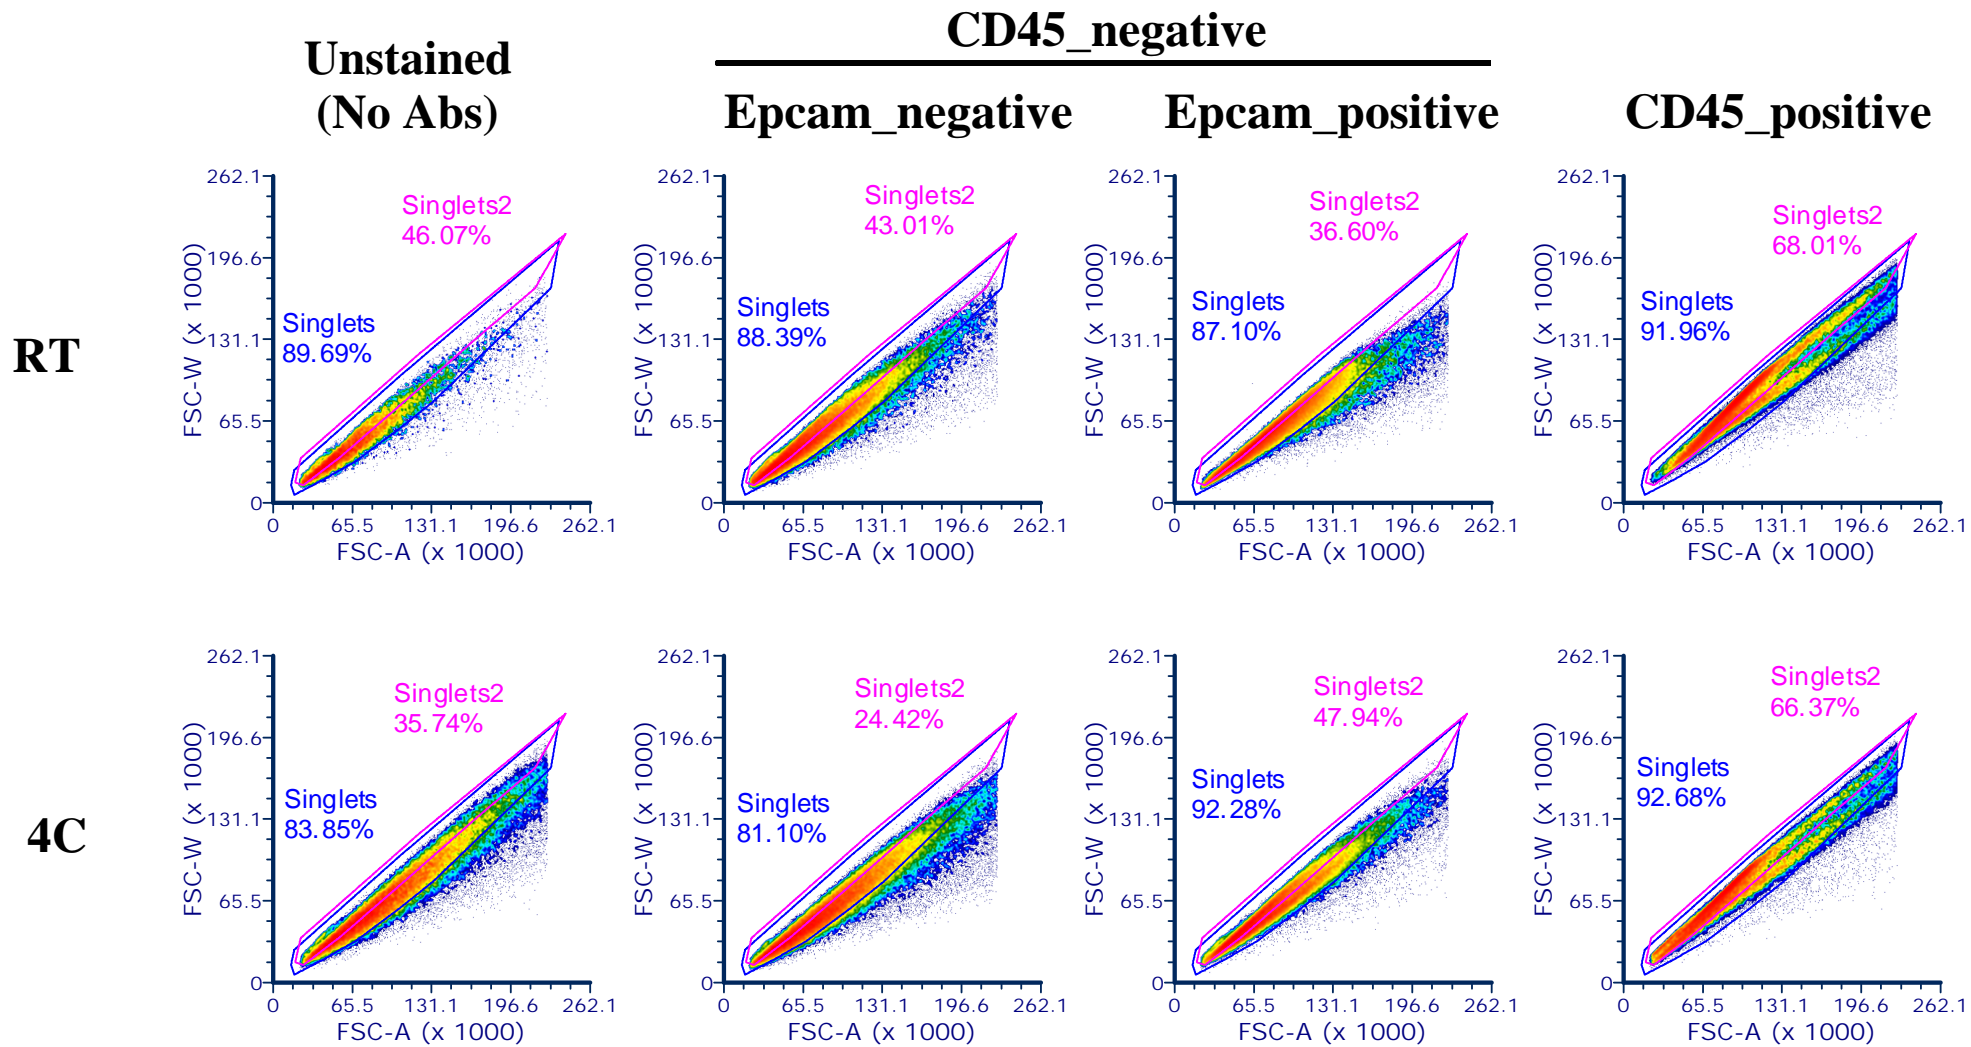

RT

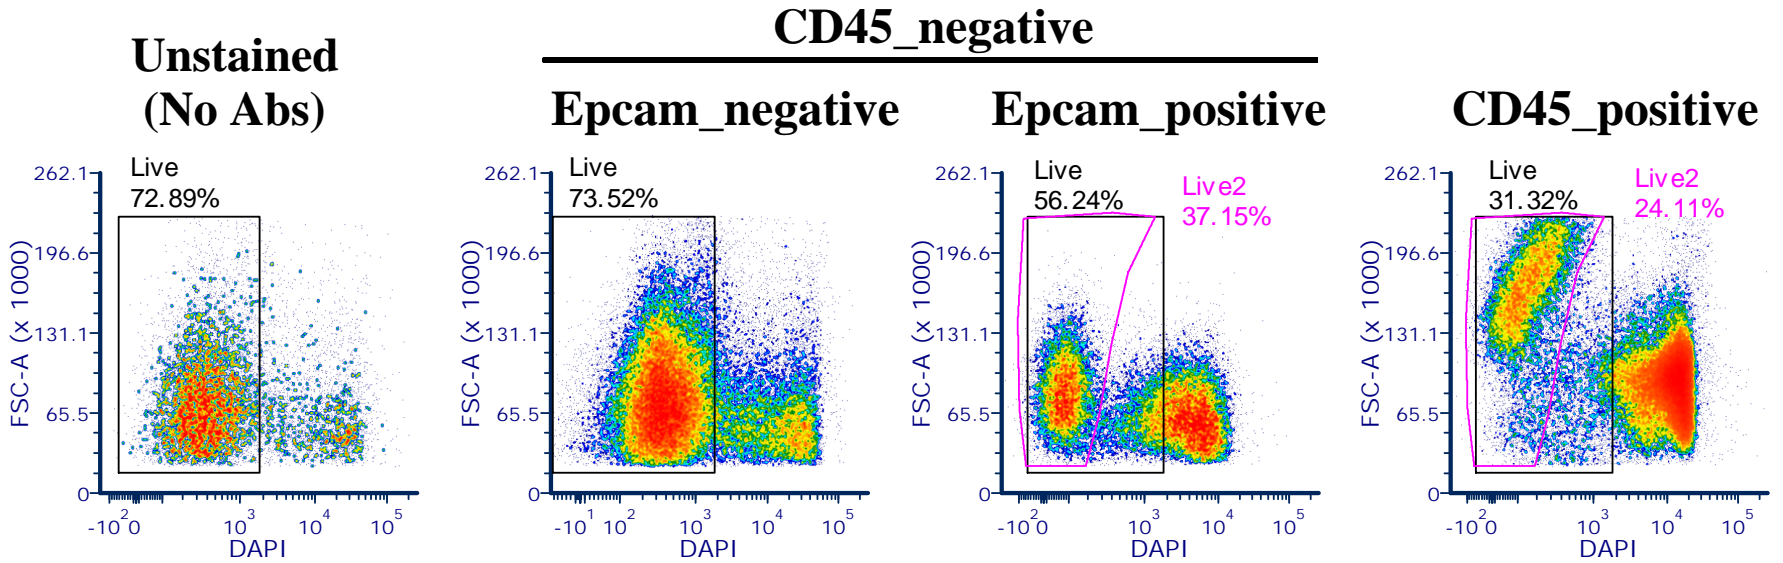

4C

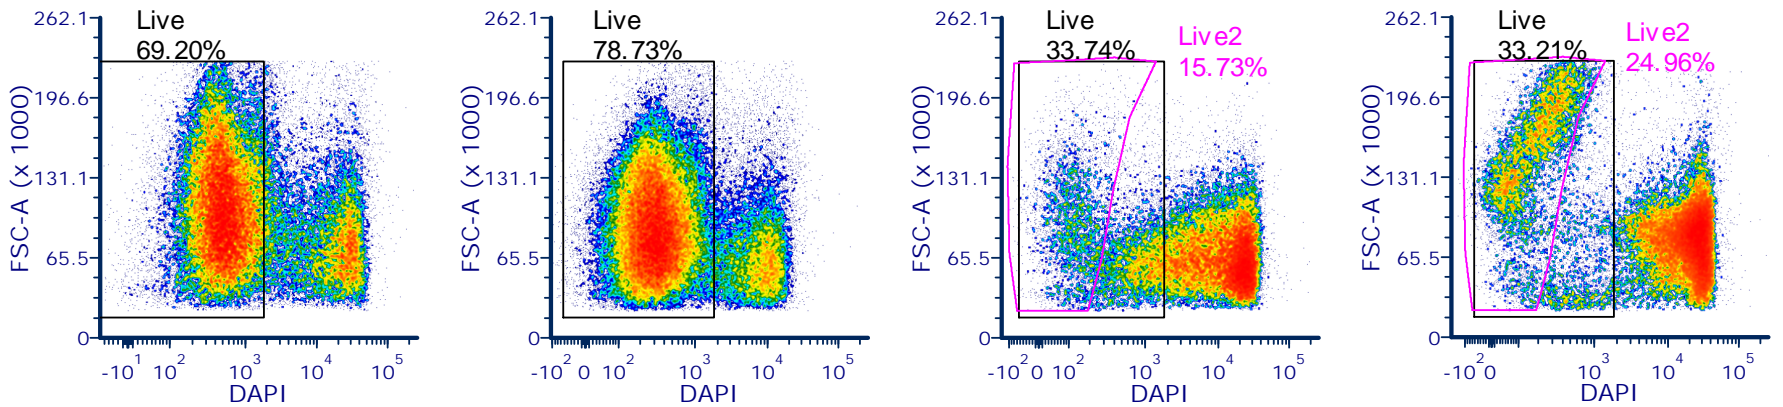

# GATE: "Live"

RT

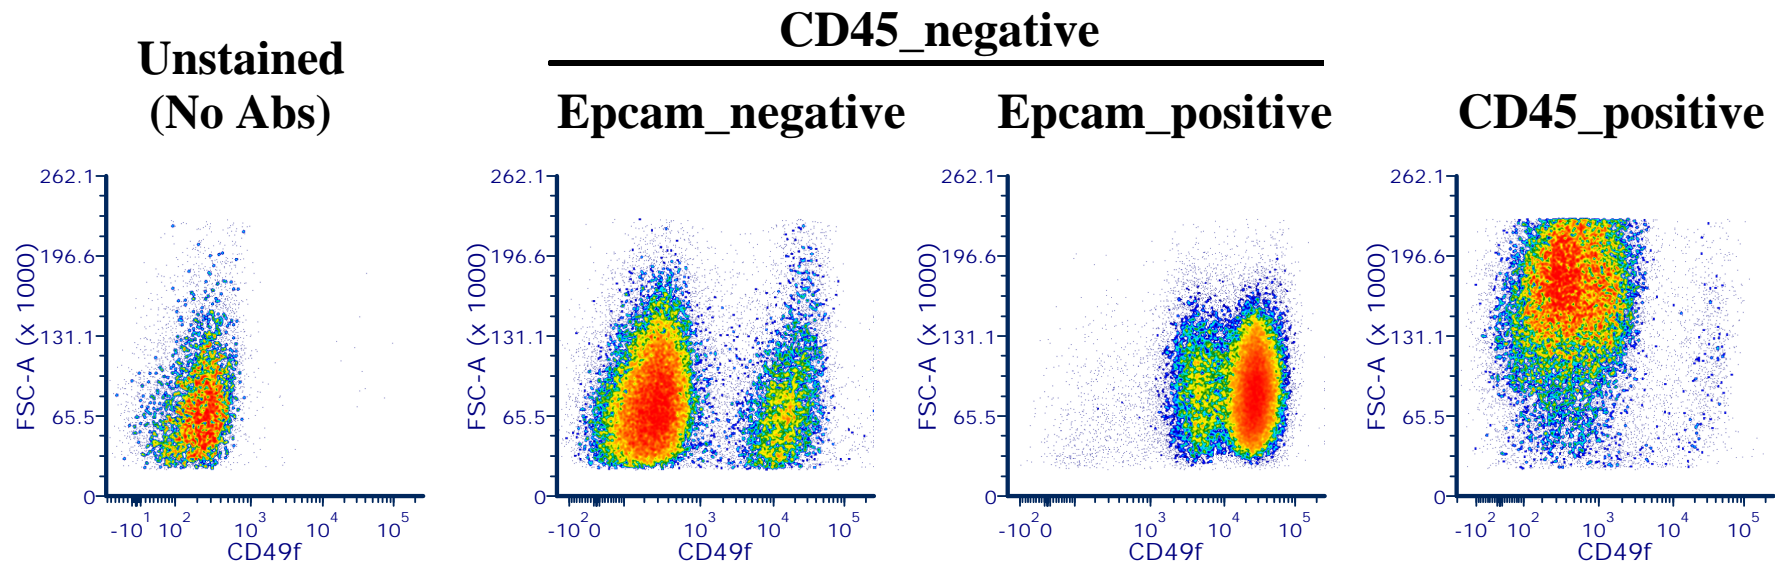

4C

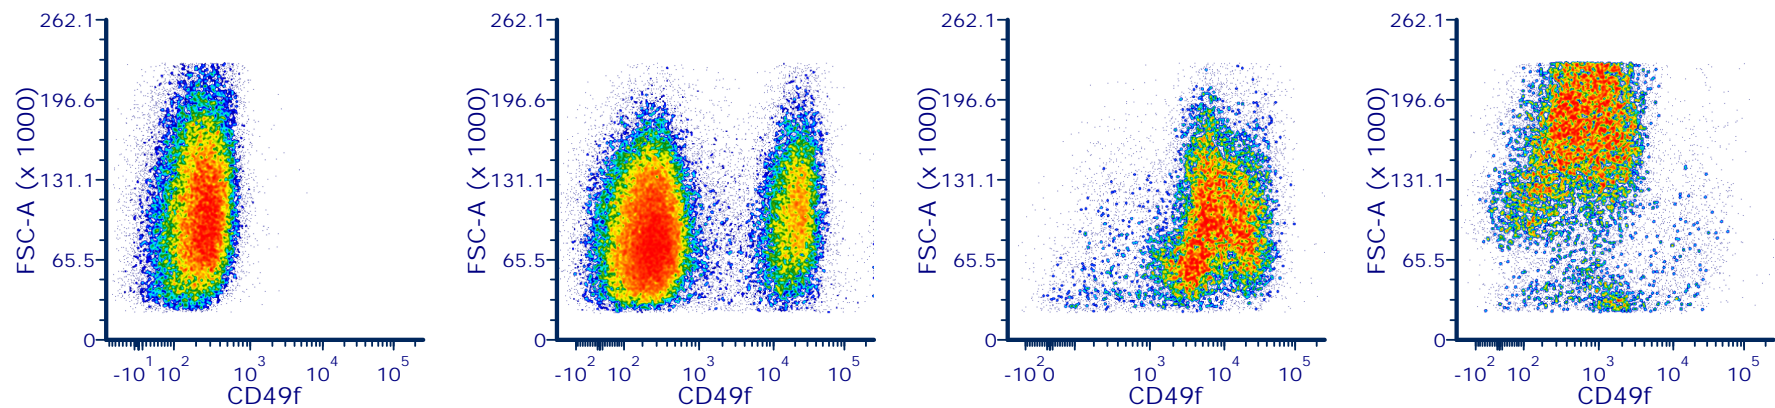

# GATE: "Live"

RT

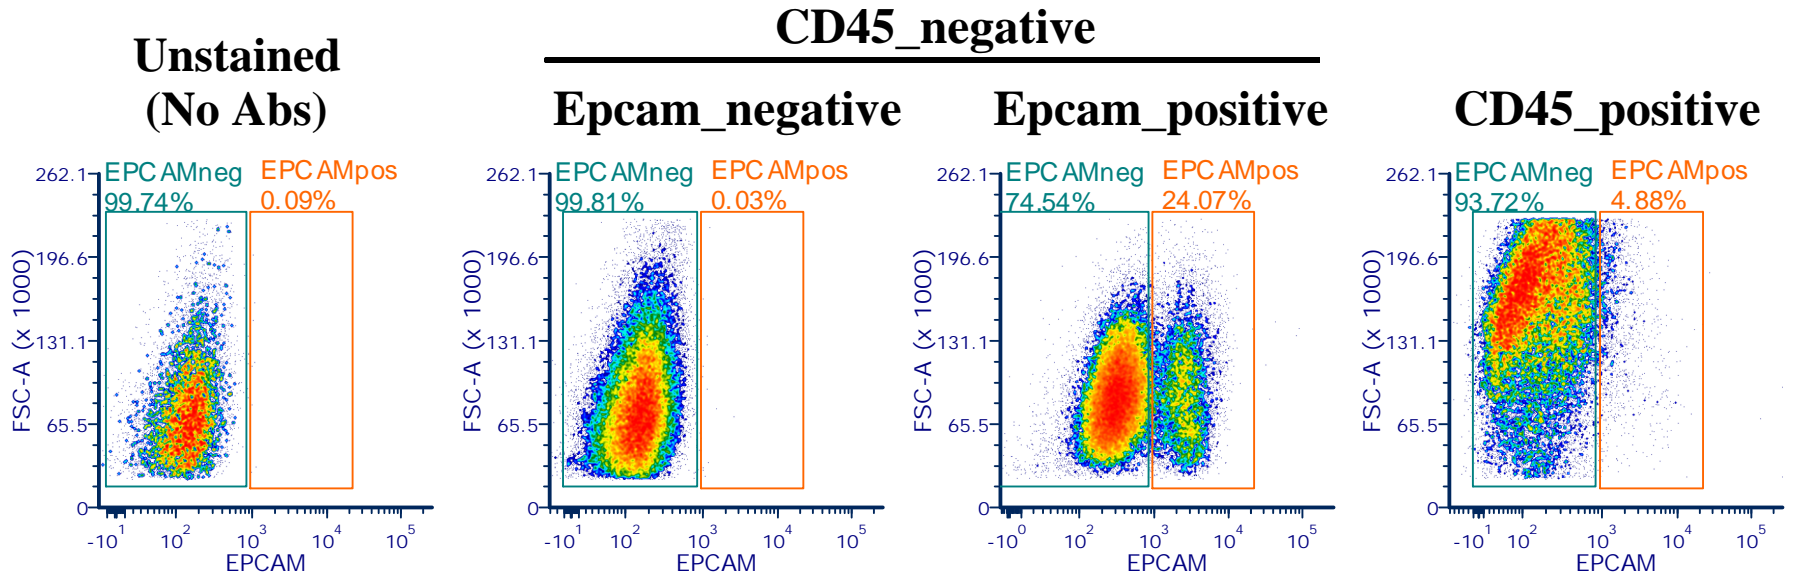

4C

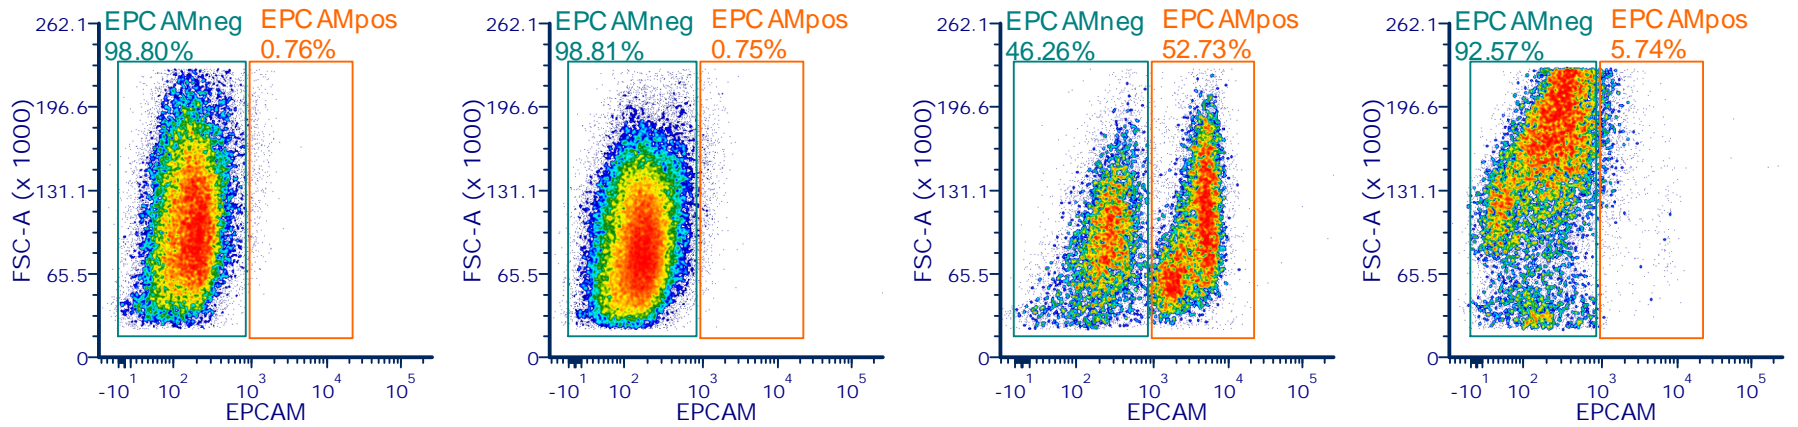

# GATE: "Live"

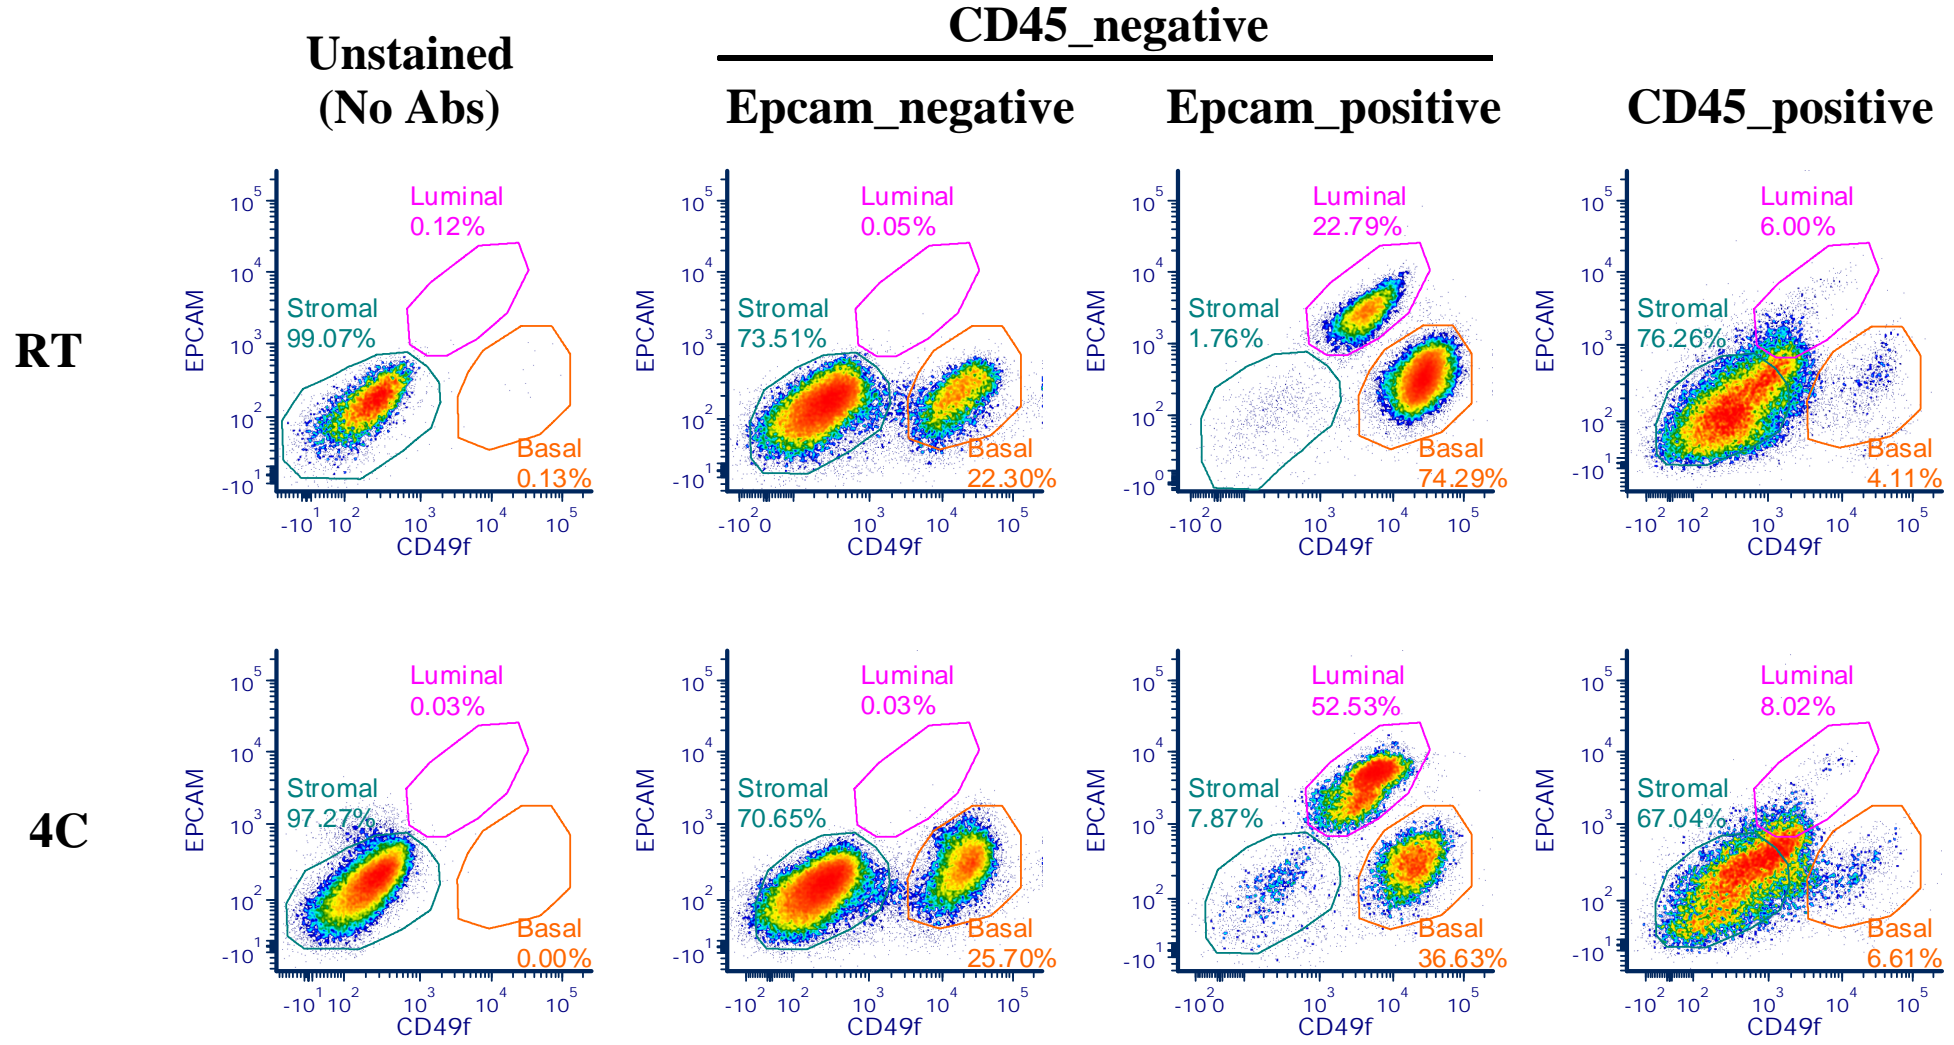

Extended Data Fig. 3A
