# Supplementary material
Source: PubMed Central journal article supplement (PMC10529063)
Supplement: NIHMS1921209-supplement-Table_S1.pdf [file NIHMS1921209-supplement-Table_S1.pdf]

| Cell # | Tissue                    | Sex  | Condition           | Technology        | Name            | Source                                 |
|--------|---------------------------|------|---------------------|-------------------|-----------------|----------------------------------------|
| 22,800 | BAT, EPI, ING)            | M    | SVF                 | Drop-Seq          | Broad SVF       | Broad Single Cell Portal <sup>1</sup>  |
| 25,010 | Mammary                   | F    | NP, G, L, PI        | 10X Genomics      | MammaryEpi      | <a href="#">GSE106273</a> <sup>2</sup> |
| 14,927 | Mammary                   | F    | NP, G, L, PI        | Microwell-seq     | MouseCellAtlas  | figshare <sup>3,4</sup>                |
| 4,481  | Mammary                   | F    | N/A                 | 10X Genomics      | TM.Mammary.10X  | figshare <sup>5,6</sup>                |
| 2,405  | Mammary                   | F    | N/A                 | FACS + Smart-seq2 | TM.Mammary.FACS | figshare <sup>5,6</sup>                |
| 4,967  | SVF (BAT, GAT, MAT, SCAT) | F, M | N/A                 | FACS + Smart-seq2 | TM.SVF.FACS     | figshare <sup>5,6</sup>                |
| 3,132  | Mammary                   | F    | Age (3m, 18m, 21m)  | FACS + Smart-seq2 | TS.Mammary.FACS | figshare <sup>7</sup>                  |
| 5,080  | SVF (BAT, GAT, MAT, SCAT) | F, M | Age (18m, 21m, 30m) | 10X Genomics      | TS.SVF.10X      | figshare <sup>7</sup>                  |
| 8,775  | SVF (BAT, GAT, MAT, SCAT) | F, M | Age (3m, 18m, 24m)  | FACS + Smart-seq2 | TS.SVF.FACS     | figshare <sup>7</sup>                  |

### References for Supplementary Table 1:

- 1 Broad Institute. *Study: Mouse Adipose Stromal Vascular Fraction*, <[https://singlecell.broadinstitute.org/single\\_cell/study/SCP708/mouse-adipose-stromal-vascular-fraction#study-summary](https://singlecell.broadinstitute.org/single_cell/study/SCP708/mouse-adipose-stromal-vascular-fraction#study-summary)> (
- 2 Bach, K. *et al.* Differentiation dynamics of mammary epithelial cells revealed by single-cell RNA sequencing. *Nature Communications* **8**, 2128, doi:10.1038/s41467-017-02001-5 (2017).

- 3 Guo, G. MCA DGE Data. *Figshare*, doi:10.6084/m9.figshare.5435866.v8 (2020).
- 4 Han, X. *et al.* Mapping the Mouse Cell Atlas by Microwell-Seq. *Cell* **172**, 1091-  
1107.e1017, doi:10.1016/j.cell.2018.02.001 (2018).
- 5 Tabula Muris: Transcriptomic characterization of 20 organs and tissues from *Mus*  
*musculus* at single cell resolution.
- 6 Tabula Muris, C. *et al.* Single-cell transcriptomics of 20 mouse organs creates a Tabula  
Muris. *Nature* **562**, 367-372, doi:10.1038/s41586-018-0590-4 (2018).
- 7 Tabula Muris, C. A single-cell transcriptomic atlas characterizes ageing tissues in the  
mouse. *Nature* **583**, 590-595, doi:10.1038/s41586-020-2496-1 (2020).
