# Supplementary material
Source: PubMed Central journal article supplement (PMC10529063)

Extended Data Fig. 4J

IB:ACTIN

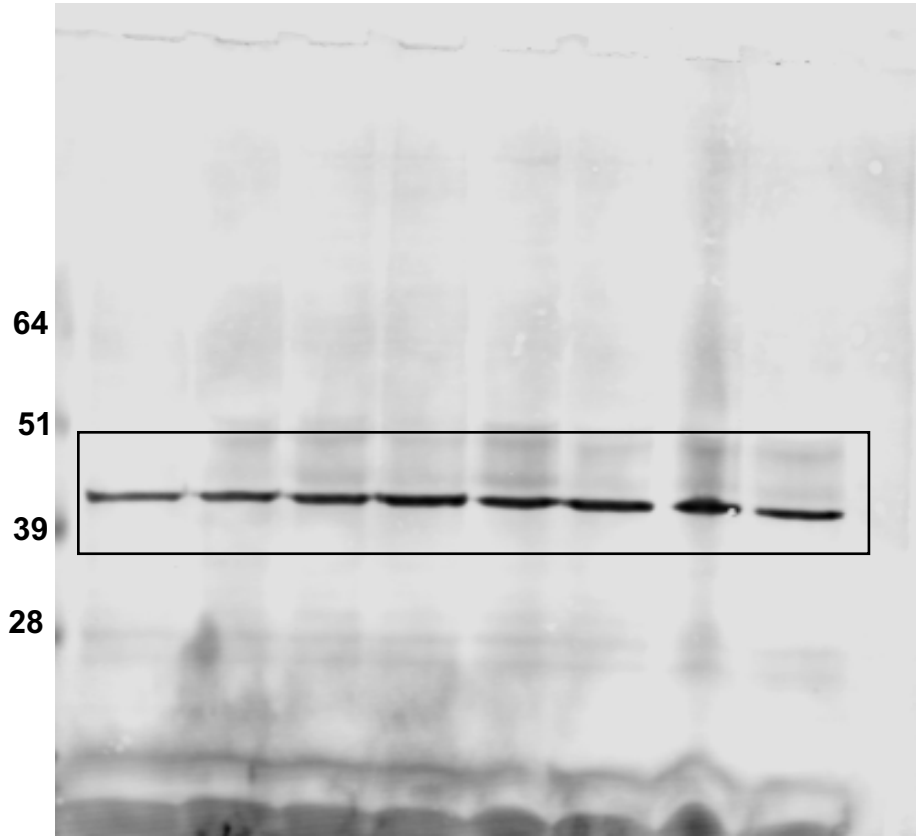

IB:UCP1

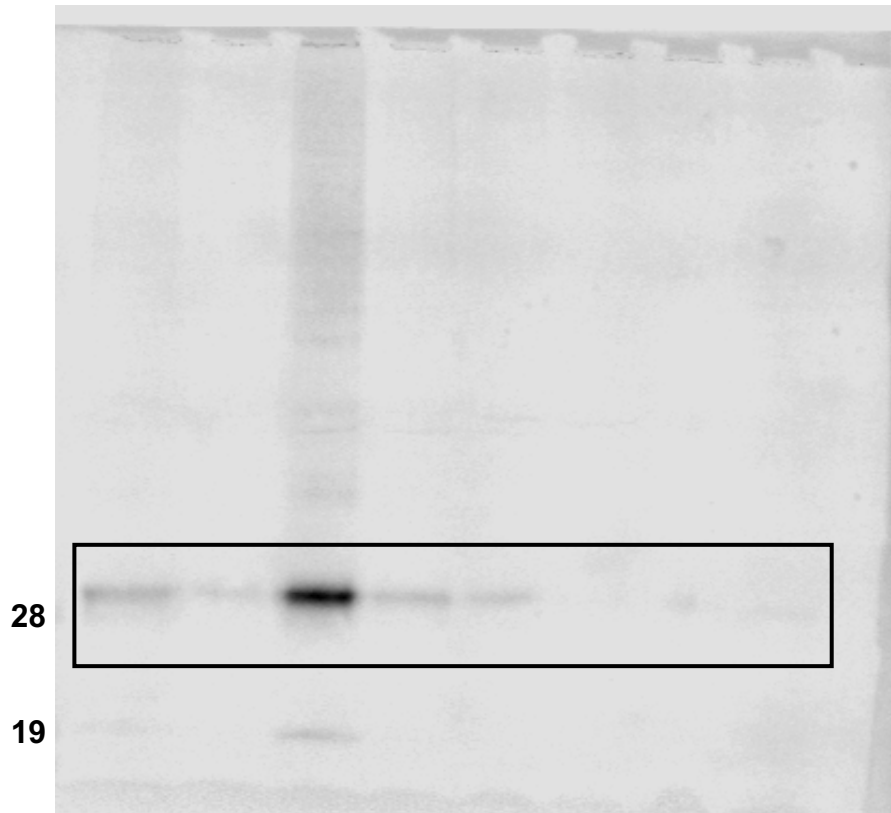

Same blot; Stripped and probed for UCP1

Supplement: NIHMS1921209-supplement-Figure_S1.pdf [file NIHMS1921209-supplement-Figure_S1.pdf]
